# Supplementary material
Source: PubMed Central journal article supplement (PMC4249654)
Supplement: NIHMS644357-supplement-supporting.pdf [file NIHMS644357-supplement-supporting.pdf]

# Highly efficient gate-tunable photocurrent generation in vertical heterostructures of layered materials

Woo Jong Yu, Yuan Liu, Hailong Zhou, Anxiang Yin, Zheng Li, Yu Huang, and Xiangfeng Duan

## 1. Schematic illustration of the device fabrication process.

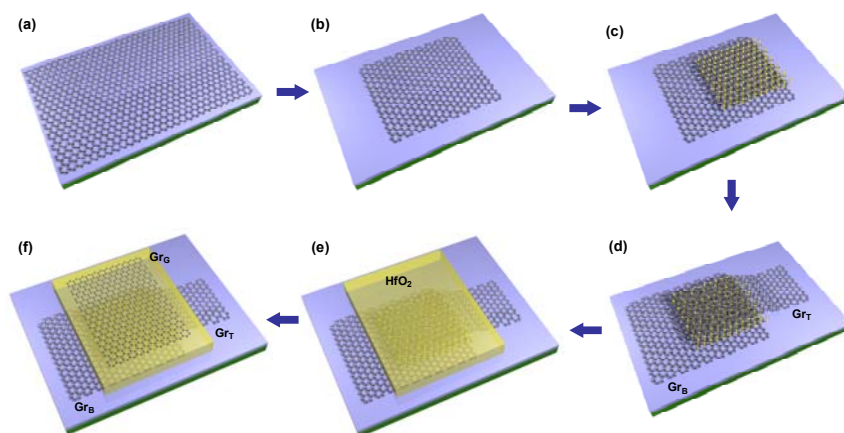

**Figure S1I Schematic illustration of the device fabrication procedures.** **a**, CVD grown monolayer graphene was transferred onto a 300-nm SiO<sub>2</sub> covered silicon substrate<sup>1-4</sup>. **b**, Bottom graphene was patterned by oxygen plasma etching using photo resist as a etching mask. **c**, MoS<sub>2</sub> layer was exfoliated onto the graphene through a micromechanical cleavage approach<sup>5</sup>. **d**, The top graphene electrode was transferred and patterned on the MoS<sub>2</sub> to overlap with MoS<sub>2</sub> and bottom graphene. **e**, For the dual-gate heterostructures, a 60-nm of HfO<sub>2</sub> dielectric layer was deposited by e-beam evaporation, followed by the transferring of another graphene layer as the top-gate electrode.

## 2. Temporal photoresponse in the vertical graphene-MoS<sub>2</sub>-graphene device.

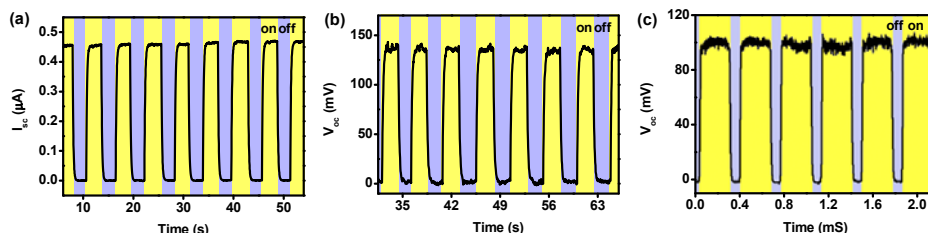

**Figure S2I Temporal photoresponse in the vertical graphene-MoS<sub>2</sub>-graphene device.** **a**, Time dependent photocurrent response and **b**, Photovoltage response under a global laser (478 nm) illumination with alternatively laser on- and off-periods.. **c**, Time dependent photovoltage measurement under a global laser (478 nm) illumination through a 2.6 kHz chopper. The periodic photoresponse characteristics exhibit the same frequency as that of the laser on-off cycles. The observed photocurrent on-off transition is less than 50  $\mu$ s, which is only limited by the speed of the mechanical chopper and our measurement capability. The intrinsic speed of the photocurrent generation is likely much higher.

3. Electrical characteristics of graphene-MoS<sub>2</sub>-graphene device.

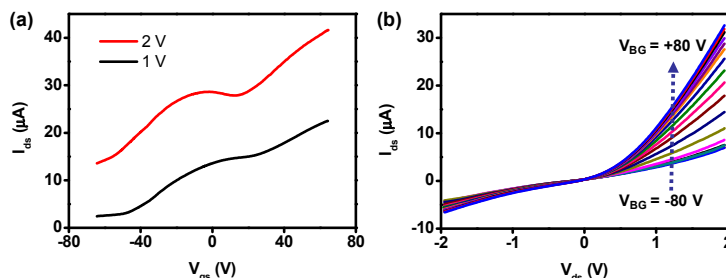

**Figure S3I** Electrical characteristics of graphene-MoS<sub>2</sub>-graphene device. **a**, Transfer characteristics of graphene-MoS<sub>2</sub>-graphene device with silicon substrate as the back-gate at  $V_{ds} = 1$  V and 2 V. **b**, Output characteristics of the same device. The back-gate voltage is varied from  $-80$  V (top) to  $80$  V (bottom) in the step of  $10$  V.

4. Simulation of the band diagram of the vertical heterostructure device.

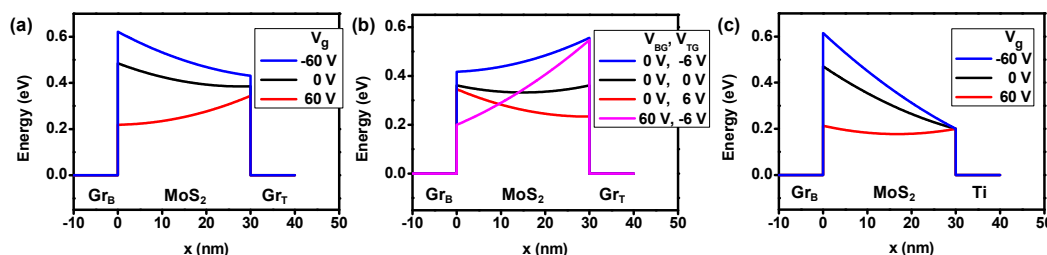

**Figure S4I** Simulation of the band diagrams. **a**, Simulated band diagram of single-gated graphene-MoS<sub>2</sub>-graphene (GMG) stack. **b**, Simulated band diagram of dual-gated GMG stack. **c**, Simulated band diagram of single-gated graphene-MoS<sub>2</sub>-Ti (GMM) stack.

To calculate the band slope and charge distribution, the configurations of GMG and GMM are considered in our simulation. Since MoS<sub>2</sub> is a semiconductor, we adapted the depletion approximation, which means MoS<sub>2</sub> is uniformly charged, and the charge density equals to its doping level. Therefore, bands of MoS<sub>2</sub> are parabolic instead of linear. This model is reasonable when the device channel is short, as in our cases.

For the simulation of GMG, we consider the electric field induced by gate as  $E_g$ ,

$$E_g = V_g / D \tag{1}$$

where  $V_g$  is the gate voltage and  $D$  is the thickness of SiO<sub>2</sub> dielectric.

Then we consider electric fields in the two graphene-MoS<sub>2</sub> interfaces as  $E_1$  and  $E_2$ . The carrier density  $n_1$  and  $n_2$  for bottom graphene and top graphene, respectively, can be given by:

$$\epsilon_1 E_g + \epsilon_s E_1 = n_1 e \tag{2}$$

$$\epsilon_s E_2 = n_2 e \tag{3}$$

where  $\epsilon_1$  and  $\epsilon_s$  are the dielectric constant for SiO<sub>2</sub> and MoS<sub>2</sub>, respectively.

$E_1$  and  $E_2$  satisfy:

$$E_1 = E_2 + \frac{Ned}{\epsilon_s} \quad (4)$$

where  $N$  is the doping level in MoS<sub>2</sub>. In our simulation,  $N$  is chosen to be  $10^{17} \text{ cm}^{-3}$ , which can be roughly estimated from transport characteristics of MoS<sub>2</sub> used in our study.

If we have  $E_1$  and  $E_2$ , we can get the potential drop  $\Delta V$  in MoS<sub>2</sub> as:

$$\Delta V = \frac{1}{2}(E_1 + E_2)d \quad (5)$$

For graphene, we have the relation between carrier density  $n$  and chemical potential  $\mu$  (Dirac point as zero) as:

$$\mu = \frac{h}{2\pi} v_F \sqrt{\pi |n - n_0|} \quad (6)$$

where  $h$  is the plank constant and  $v_F$  is the Fermi velocity,  $n_0$  is the fixed charge graphene. As we know, intrinsic graphene in air is p-doped, and the fix charge can come from SiO<sub>2</sub> substrate or absorbed H<sub>2</sub>O and O<sub>2</sub> molecules.

When a bias voltage  $V_b$  is applied, we get:

$$eV_b = e\Delta V + \mu_2 - \mu_1 \quad (7)$$

For GMM, it will be different because the band of MoS<sub>2</sub> are pinned in the metal side. Equation (7) should be replaced by:

$$eV_b = e\Delta V - \mu_1 + W_g - W_m \quad (8)$$

where  $W_g$  is the potential drop from the vacuum level to Dirac point of graphene,  $W_m$  is work function of metal. Another difference is that  $n_2$  should be the charge density in the interface of MoS<sub>2</sub> and metal.

Equations above are solved self-consistently to obtain the band diagrams.

## 5. Simulation of gate dependant depletion width of graphene-MoS<sub>2</sub> schottky contact.

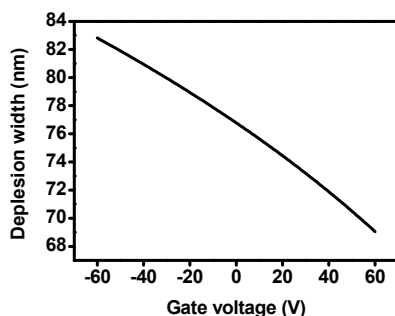

**Figure S5I Simulated depletion width in graphene-MoS<sub>2</sub> schottky contact at the various gate voltages.** In the graphene-MoS<sub>2</sub>-graphene device, the total depletion width at both contact is doubled to be around 140-170 nm.

The electric field induced by gate  $E_g$  can be written as the following:

$$E_g = V_g / D \quad (1)$$

where  $V_g$  is the gate voltage and  $D$  is the thickness of SiO<sub>2</sub> dielectric.

Considering the electric field in the graphene-MoS<sub>2</sub> interface as  $E$ , the carrier density  $n$  for the graphene can be given by:

$$\epsilon_1 \epsilon_0 E_g + \epsilon_2 \epsilon_0 E = ne \quad (2)$$

where  $\epsilon_1$  and  $\epsilon_2$  are the dielectric constant for SiO<sub>2</sub> and MoS<sub>2</sub>, respectively.

$E$  satisfies:

$$E = \frac{Ned}{\epsilon_2 \epsilon_0} \quad (3)$$

where  $N$  is the doping level in MoS<sub>2</sub>, and  $d$  the depletion length. In our simulation,  $N$  is chosen to be  $10^{17} \text{ cm}^{-3}$ , which can be roughly estimated from transport characteristics of MoS<sub>2</sub> used in our study.

We can get the potential drop  $\Delta V$  in MoS<sub>2</sub> as:

$$\Delta V = \frac{1}{2} Ed \quad (4)$$

For graphene, we have the relation between carrier density  $n$  and chemical potential  $\mu$  (Dirac point as zero) as:

$$\mu = \frac{h}{2\pi} v_F \sqrt{\pi |n - n_0|} \quad (5)$$

where  $h$  is the plank constant and  $v_F$  is the Fermi velocity,  $n_0$  is the fixed charge graphene. As we know, intrinsic graphene in air is p-doped, and the fix charge can come from SiO<sub>2</sub> substrate or absorbed H<sub>2</sub>O and O<sub>2</sub> molecules.

$$eV_b = e\Delta V - \mu + W_g - W_{MoS_2} \quad (6)$$

where  $W_g$  is the potential drop from the vacuum level to Dirac point of graphene,  $W_m$  is the work function (4.55 eV)<sup>6</sup> of MoS<sub>2</sub>.  $d$  is calculated by solving above equations. p-doped graphene (5.0 eV) was used in this calculation.

## 6. Optical absorption spectroscopy of multi-layer MoS<sub>2</sub> flake.

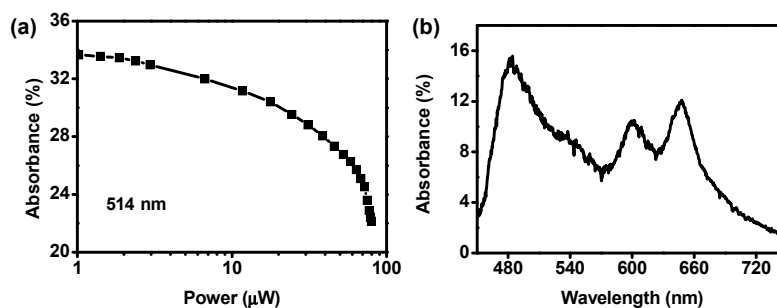

**Figure S61 Optical absorption spectroscopy of multi-layer MoS<sub>2</sub> flake.** **a**, Power dependent optical absorption of a multi-layer MoS<sub>2</sub> flake. The absorption was determined by comparing the focused laser (514 nm) transmission through the same glass substrate on and off an MoS<sub>2</sub> flake. The thickness of the MoS<sub>2</sub> flake is about 56 nm. **b**, Absorption spectra of a multi-layer MoS<sub>2</sub> flake on glass substrates. The thickness of MoS<sub>2</sub> flake is about 16 nm. The absorption spectra of MoS<sub>2</sub> was determined from the reflectance measurements<sup>7,8</sup>. To obtain the absorption spectrum, the reflectance spectrum from the MoS<sub>2</sub> flake on a glass substrate ( $R_{m+s}$ ) and that from

the same bare glass substrate ( $R_s$ ) were measured using an optical microscope coupled with a spectrometer and CCD camera. The fractional change in the reflectance,  $\delta_R$ , can be determined as the difference of these two quantities divided by the reflectance from the bare glass substrate ( $\delta_R = \frac{R_{m+s} - R_s}{R_s}$ ). The absorbance of MoS<sub>2</sub> ( $A$ ) can then be determined by using the relation:  $\delta_R = \frac{4}{n_{sub}^2 - 1} A$ , where  $n_{sub}$  is the refractive index of the glass substrate.

### 7. Schematic illustration of the fabrication procedure of graphene-MoS<sub>2</sub>-metal (Ti) device.

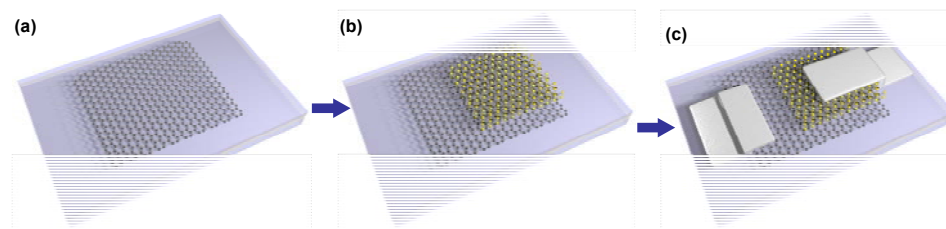

**Figure S71 Schematic illustration of the fabrication procedure for graphene-MoS<sub>2</sub>-metal (Ti) device.** **a**, CVD grown monolayer graphene was transferred and patterned on the ITO glass with 30-nm Al<sub>2</sub>O<sub>3</sub> dielectric layer<sup>1-4</sup>. **b**, MoS<sub>2</sub> layer was exfoliated onto the graphene through a micromechanical cleavage approach<sup>5</sup>. **c**, As a final step, Ti/Au (50 nm/ 50 nm) was patterned as a top electrode and contact electrode for graphene using e-beam lithography.

### References

1. Liu, L. *et al.* A systematic study of atmospheric pressure chemical vapor deposition growth of large-area monolayer graphene, *J. Mater. Chem.*, **22**, 1498-1503 (2012).
2. Li, X. *et al.* Large-area synthesis of high quality and uniform graphene films on copper foils. *Science* **324**, 1312-1314 (2009).
3. Reina, A. *et al.* Large area, few-layer graphene films on arbitrary substrates by chemical vapour deposition. *Nano Lett.* **9**, 30-35 (2009).
4. Zhou, H. *et al.*, Chemical vapour deposition growth of large single crystals of monolayer and bilayer graphene, *Nat. Commun.* **4**:2096, doi:10.1038/ncomms3096 (2013).
5. Radisavljevic, B., Radenovic, A., Brivio, J., Giacometti, V., Kis, A. Single-layer MoS<sub>2</sub> transistors. *Nature Nanotechnol.* **6**, 147-150 (2011).
6. Williams, R. H. & Mcevoy, A. J. Photoemission studies of MoS<sub>2</sub>. *Phys. Stat. Sol. (b)* **47**, 217-224 (1971).
7. Mak, K. F., Lee, C., Hone, J., Shan, J. & Heinz & T. F. Atomically thin MoS<sub>2</sub>: A new direct-gap semiconductor. *Phys. Rev. Lett.* **105**, 136805 (2010).
8. Mak, K. F. *et al.* Measurement of the optical conductivity of graphene. *Phys. Rev. Lett.* **101**, 196405 (2008).
